# Supplementary material
Source: HighWire-hosted journal article supplement (https://bmjopen.bmj.com/content/12/12/e065200)

**Supplementary Table 1: Select characteristics of the pregnant women who participated in the exit interviews.**

| Background characteristics                         | All women      |                                                  |                                              |                                              | Women in Gaya district |                                                                |                                                                 |                                                                 | Women in Supaul district |                                                |                                                 |                                                |
|----------------------------------------------------|----------------|--------------------------------------------------|----------------------------------------------|----------------------------------------------|------------------------|----------------------------------------------------------------|-----------------------------------------------------------------|-----------------------------------------------------------------|--------------------------|------------------------------------------------|-------------------------------------------------|------------------------------------------------|
|                                                    | Total<br>N=814 | In 1 <sup>st</sup><br>trimester<br>N =103<br>(%) | In 2 <sup>nd</sup><br>trimester<br>N=405 (%) | In 3 <sup>rd</sup><br>trimester<br>N=306 (%) | Total<br>N=549         | In 1 <sup>st</sup><br>trimester of<br>pregnancy<br>N=69<br>(%) | In 2 <sup>nd</sup><br>trimester of<br>pregnancy<br>N=273<br>(%) | In 3 <sup>rd</sup><br>trimester of<br>pregnancy<br>N=207<br>(%) | Total<br>N=265           | In 1 <sup>st</sup><br>trimester<br>N=34<br>(%) | In 2 <sup>nd</sup><br>trimester<br>N=132<br>(%) | In 3 <sup>rd</sup><br>trimester<br>N=99<br>(%) |
| <b>Maternal age</b>                                |                |                                                  |                                              |                                              |                        |                                                                |                                                                 |                                                                 |                          |                                                |                                                 |                                                |
| 15-19 years                                        | <b>118</b>     | 13 (12.6)                                        | 68 (16.8)                                    | 37 (12.1)                                    | <b>74</b>              | 9 (13.0)                                                       | 43 (15.7)                                                       | 22 (10.7)                                                       | <b>44</b>                | 4 (11.8)                                       | 25 (18.9)                                       | 15 (15.1)                                      |
| 20-24 years                                        | <b>488</b>     | 69 (67.0)                                        | 242 (59.7)                                   | 176 (57.7)                                   | <b>332</b>             | 46 (66.7)                                                      | 159 (58.2)                                                      | 126 (61.2)                                                      | <b>156</b>               | 23 (67.6)                                      | 83 (62.9)                                       | 50 (50.5)                                      |
| 25-29 years                                        | <b>174</b>     | 18 (17.5)                                        | 83 (20.5)                                    | 73 (23.9)                                    | <b>119</b>             | 13 (18.8)                                                      | 62 (22.7)                                                       | 44 (21.4)                                                       | <b>55</b>                | 5 (14.7)                                       | 21 (15.9)                                       | 29 (29.3)                                      |
| 30-40 years                                        | <b>34</b>      | 3 (2.9)                                          | 12 (3.0)                                     | 19 (6.2)                                     | <b>24</b>              | 1 (1.4)                                                        | 9 (3.3)                                                         | 14 (6.8)                                                        | <b>10</b>                | 2 (5.9)                                        | 3 (2.3)                                         | 5 (5.1)                                        |
| <b>Maternal caste*</b>                             |                |                                                  |                                              |                                              |                        |                                                                |                                                                 |                                                                 |                          |                                                |                                                 |                                                |
| Scheduled caste/tribe                              | <b>259</b>     | 27 (26.7)                                        | 129 (32.3)                                   | 103 (34.3)                                   | <b>201</b>             | 25 (36.2)                                                      | 98 (35.9)                                                       | 78 (37.7)                                                       | <b>58</b>                | 2 (6.3)                                        | 31 (24.4)                                       | 25 (26.9)                                      |
| Other backward class                               | <b>457</b>     | 64 (63.4)                                        | 232 (58.0)                                   | 161 (53.7)                                   | <b>311</b>             | 39 (56.5)                                                      | 158(57.9)                                                       | 114(55.1)                                                       | <b>146</b>               | 25 (78.1)                                      | 74 (58.3)                                       | 47 (50.5)                                      |
| General                                            | <b>85</b>      | 10 (9.9)                                         | 39 (9.7)                                     | 36 (12.0)                                    | <b>37</b>              | 5 (7.3)                                                        | 17 (6.2)                                                        | 15 (7.3)                                                        | <b>48</b>                | 5 (15.6)                                       | 22 (17.3)                                       | 21 (22.6)                                      |
| <b>Number of ANC visit on the day of interview</b> |                |                                                  |                                              |                                              |                        |                                                                |                                                                 |                                                                 |                          |                                                |                                                 |                                                |
| 1 <sup>st</sup> visit                              | <b>259</b>     | 61 (59.2)                                        | 134(33.1)                                    | 64 (20.9)                                    | <b>189</b>             | 44 (63.7)                                                      | 101 (37.0)                                                      | 44 (21.3)                                                       | <b>70</b>                | 17 (50.0)                                      | 33 (25.0)                                       | 20 (20.2)                                      |
| 2 <sup>nd</sup> or 3 <sup>rd</sup> visit           | <b>273</b>     | 33 (32.0)                                        | 145(35.8)                                    | 95 (31.0)                                    | <b>177</b>             | 19 (27.5)                                                      | 90 (32.9)                                                       | 68 (32.8)                                                       | <b>96</b>                | 14 (41.2)                                      | 55 (41.6)                                       | 27 (27.3)                                      |
| 4 <sup>th</sup> visit or more                      | <b>282</b>     | 9 (8.7)                                          | 126 31.1)                                    | 147 (48.0)                                   | <b>183</b>             | 6 (8.7)                                                        | 82 (30.0)                                                       | 95 (45.9)                                                       | <b>99</b>                | 3 (8.8)                                        | 44 (33.3)                                       | 52 (52.5)                                      |

\*Data not available for 13 pregnant women

**Supplementary Table 2. Coverage of quality ANC services as reported in the exit interviews on the PMSMA day with maternal age and caste of women. CI denotes confidence interval.**

| Background             | All women      |                                                                                     |                                                                                        |                                                      |                                                      | Women in Gaya district |                                                                                     |                                                                                        |                                                      |                                                      | Women in Supaul district |                                                                                     |                                                                                        |                                                      |                                                      |
|------------------------|----------------|-------------------------------------------------------------------------------------|----------------------------------------------------------------------------------------|------------------------------------------------------|------------------------------------------------------|------------------------|-------------------------------------------------------------------------------------|----------------------------------------------------------------------------------------|------------------------------------------------------|------------------------------------------------------|--------------------------|-------------------------------------------------------------------------------------|----------------------------------------------------------------------------------------|------------------------------------------------------|------------------------------------------------------|
|                        | Total<br>N=814 | In 1 <sup>st</sup><br>trimester<br>with<br>abdomen<br>check-up<br>N (%;<br>(95% CI) | In 1 <sup>st</sup><br>trimester<br>without<br>abdomen<br>check-up<br>N (%;<br>(95% CI) | In 2 <sup>nd</sup><br>trimester<br>N (%;<br>(95% CI) | In 3 <sup>rd</sup><br>trimester<br>N (%;<br>(95% CI) | Total<br>N=549         | In 1 <sup>st</sup><br>trimester<br>with<br>abdomen<br>check-up<br>N (%;<br>(95% CI) | In 1 <sup>st</sup><br>trimester<br>without<br>abdomen<br>check-up<br>N (%;<br>(95% CI) | In 2 <sup>nd</sup><br>trimester<br>N (%;<br>(95% CI) | In 3 <sup>rd</sup><br>trimester<br>N (%;<br>(95% CI) | Total<br>N=265           | In 1 <sup>st</sup><br>trimester<br>with<br>abdomen<br>check-up<br>N (%;<br>(95% CI) | In 1 <sup>st</sup><br>trimester<br>without<br>abdomen<br>check-up<br>N (%;<br>(95% CI) | In 2 <sup>nd</sup><br>trimester<br>N (%;<br>(95% CI) | In 3 <sup>rd</sup><br>trimester<br>N (%;<br>(95% CI) |
| <b>Maternal age</b>    |                |                                                                                     |                                                                                        |                                                      |                                                      |                        |                                                                                     |                                                                                        |                                                      |                                                      |                          |                                                                                     |                                                                                        |                                                      |                                                      |
| 15-19 years            | <b>118</b>     | 15.4<br>(3.6-47.1)                                                                  | 38.5<br>(16.1-67.0)                                                                    | 32.3<br>(22.2-44.4)                                  | 40.5<br>(25.9-57.1)                                  | <b>74</b>              | 0                                                                                   | 33.3<br>(10.1-69.1)                                                                    | 34.9<br>(22.1-50.3)                                  | 50.0<br>(29.7-70.3)                                  | <b>44</b>                | 50.0<br>(8.7-91.3)                                                                  | 50.0<br>(8.7-91.3)                                                                     | 28.0<br>(13.7-48.9)                                  | 26.7<br>(9.9-54.7)                                   |
| 20-24 years            | <b>488</b>     | 4.3<br>(1.4-12.9)                                                                   | 24.6<br>(15.7-36.3)                                                                    | 33.5<br>(27.8-39.7)                                  | 29.5<br>(23.2-36.7)                                  | <b>332</b>             | 2.2<br>(0.3-14.6)                                                                   | 28.3<br>(16.9-43.3)                                                                    | 38.4<br>(31.1-46.2)                                  | 28.6<br>(21.3-37.1)                                  | <b>156</b>               | 8.7<br>(2.0-30.7)                                                                   | 17.4<br>(6.3-39.8)                                                                     | 24.1<br>(16.0-34.6)                                  | 32.0<br>(20.4-46.3)                                  |
| 25-29 years            | <b>174</b>     | 11.1<br>(2.6-36.6)                                                                  | 27.8<br>(11.6-53.0)                                                                    | 40.9<br>(30.8-51.9)                                  | 31.5<br>(21.8-43.1)                                  | <b>119</b>             | 15.4<br>(3.6-47.3)                                                                  | 23.1 (7.1-54.1)                                                                        | 40.3<br>(28.8-53.0)                                  | 25.0<br>(14.3-40.0)                                  | <b>55</b>                | 0                                                                                   | 40.0<br>(7.7-84.2)                                                                     | 42.8<br>(23.5-64.7)                                  | 41.4<br>(24.8-60.2)                                  |
| 30-40 years            | <b>34</b>      | 0                                                                                   | 66.7<br>(9.3-97.5)                                                                     | 33.3<br>(12.4-63.7)                                  | 47.4<br>(26.2-69.5)                                  | <b>24</b>              | 0                                                                                   | 0                                                                                      | 33.3<br>(10.2-68.6)                                  | 28.6<br>(10.7-57.3)                                  | <b>10</b>                | 0                                                                                   | 100.0                                                                                  | 33.3<br>(2.5-90.7)                                   | 100.0                                                |
| <b>Maternal caste*</b> |                |                                                                                     |                                                                                        |                                                      |                                                      |                        |                                                                                     |                                                                                        |                                                      |                                                      |                          |                                                                                     |                                                                                        |                                                      |                                                      |
| Scheduled caste/tribe  | <b>259</b>     | 3.7<br>(0.5-23.2)                                                                   | 22.2<br>(10.1-42.1)                                                                    | 34.1<br>(26.4-42.8)                                  | 32.0<br>(23.7-41.7)                                  | <b>201</b>             | 4.0<br>(0.5-25.0)                                                                   | 24.0<br>(10.8-45.0)                                                                    | 35.7<br>(26.8-45.7)                                  | 34.6<br>(24.8-45.9)                                  | <b>58</b>                | 0                                                                                   | 0                                                                                      | 29.0<br>(15.6-47.6)                                  | 24.0<br>(10.9-44.9)                                  |

|                      |            |                   |                     |                     |                     |            |                   |                     |                     |                     |            |                    |                     |                     |                     |
|----------------------|------------|-------------------|---------------------|---------------------|---------------------|------------|-------------------|---------------------|---------------------|---------------------|------------|--------------------|---------------------|---------------------|---------------------|
| Other backward class | <b>457</b> | 9.4<br>(4.2-19.6) | 31.3<br>(21.0-43.8) | 33.6<br>(27.8-40.0) | 31.7<br>(24.9-39.3) | <b>311</b> | 5.1<br>(1.2-19.0) | 33.3<br>(20.1-49.8) | 38.6<br>(31.3-46.5) | 30.7<br>(22.9-39.8) | <b>146</b> | 16.0<br>(5.8-37.2) | 28.0<br>(13.3-49.6) | 23.0<br>(14.7-34.1) | 34.0<br>(21.8-48.9) |
| General              | <b>85</b>  | 0                 | 20.0<br>(4.6-56.6)  | 38.5<br>(24.5-54.6) | 33.3<br>(19.8-50.3) | <b>37</b>  | 0                 | 0                   | 47.1<br>(24.9-70.4) | 6.7<br>(0.9-37.1)   | <b>48</b>  | 0                  | 40.0<br>(7.7-84.2)  | 31.8<br>(15.6-54.1) | 52.4<br>(31.1-72.8) |

*\*Data not available for 13 pregnant women*

**Supplementary Table 3: Availability of the staff on the PMSMA day to provide antenatal care services. NA denotes not applicable.**

| District,<br>Facility  | Number of staff |                |                   |     |            |            |       | Total<br>pregnant<br>women<br>registered<br>for ANC<br>services | Average number of pregnant<br>women |               |            |                       | Coverage of<br>quality ANC<br>services as<br>reported in<br>the exit<br>interviews |
|------------------------|-----------------|----------------|-------------------|-----|------------|------------|-------|-----------------------------------------------------------------|-------------------------------------|---------------|------------|-----------------------|------------------------------------------------------------------------------------|
|                        | Doctor          | Staff<br>nurse | Lab<br>technician | ANM | Counsellor | Pharmacist | Total |                                                                 | Per<br>staff                        | Per<br>doctor | Per<br>ANM | Per lab<br>technician |                                                                                    |
| <b>Gaya,<br/>CHC 1</b> |                 |                |                   |     |            |            |       |                                                                 |                                     |               |            |                       |                                                                                    |
| Round 1                | 1               | 0              | 1                 | 3   | 0          | 1          | 6     | 70                                                              | 12                                  | 70            | 23.3       | 70                    | 74.5                                                                               |
| Round 2                | 2               | 0              | 0                 | 4   | 0          | 1          | 7     | 69                                                              | 10                                  | 34.5          | 17.3       | NA                    | 0                                                                                  |
| Round 3                | 2               | 0              | 1                 | 5   | 0          | 1          | 9     | 74                                                              | 8                                   | 37            | 14.8       | 74                    | 28.3                                                                               |
| <b>Gaya,<br/>CHC 2</b> |                 |                |                   |     |            |            |       |                                                                 |                                     |               |            |                       |                                                                                    |
| Round 1                | 1               | 0              | 2                 | 4   | 0          | 1          | 8     | 65                                                              | 8                                   | 65            | 16.3       | 32.5                  | 50.0                                                                               |
| Round 2                | 1               | 0              | 2                 | 4   | 0          | 1          | 8     | 41                                                              | 5                                   | 41            | 10.3       | 20.5                  | 90.3                                                                               |
| Round 3                | 1               | 0              | 2                 | 2   | 0          | 1          | 6     | 79                                                              | 13                                  | 79            | 39.5       | 39.5                  | 71.4                                                                               |
| <b>Gaya,<br/>SDH</b>   |                 |                |                   |     |            |            |       |                                                                 |                                     |               |            |                       |                                                                                    |
| Round 1                | 2               | 2              | 2                 | 2   | 1          | 1          | 10    | 89                                                              | 9                                   | 44.5          | 44.5       | 44.5                  | 4.4                                                                                |

| District,<br>Facility    | Number of staff |                |                   |     |            |            |       | Total<br>pregnant<br>women<br>registered<br>for ANC<br>services | Average number of pregnant<br>women |               |            |                       | Coverage of<br>quality ANC<br>services as<br>reported in<br>the exit<br>interviews |
|--------------------------|-----------------|----------------|-------------------|-----|------------|------------|-------|-----------------------------------------------------------------|-------------------------------------|---------------|------------|-----------------------|------------------------------------------------------------------------------------|
|                          | Doctor          | Staff<br>nurse | Lab<br>technician | ANM | Counsellor | Pharmacist | Total |                                                                 | Per<br>staff                        | Per<br>doctor | Per<br>ANM | Per lab<br>technician |                                                                                    |
| Round 2                  | 2               | 0              | 1                 | 2   | 1          | 1          | 7     | 71                                                              | 10                                  | 35.5          | 35.5       | 71                    | 0                                                                                  |
| Round 3                  | 4               | 0              | 1                 | 2   | 0          | 1          | 8     | 102                                                             | 12                                  | 25.5          | 51         | 102                   | 4.3                                                                                |
| <b>Supaul,<br/>CHC 1</b> |                 |                |                   |     |            |            |       |                                                                 |                                     |               |            |                       |                                                                                    |
| Round 1                  | 3               | 0              | 1                 | 12  | 0          | 0          | 16    | 122                                                             | 8                                   | 40.7          | 10.2       | 122                   | 88.9                                                                               |
| <b>Supaul,<br/>CHC 2</b> |                 |                |                   |     |            |            |       |                                                                 |                                     |               |            |                       |                                                                                    |
| Round 1                  | 1               | 0              | 1                 | 5   | 0          | 0          | 7     | 118                                                             | 16                                  | 118           | 23.6       | 118                   | 1.5                                                                                |
| <b>Supaul,<br/>SDH</b>   |                 |                |                   |     |            |            |       |                                                                 |                                     |               |            |                       |                                                                                    |
| Round 1                  | 2               | 1              | 2                 | 5   | 1          | 1          | 12    | 124                                                             | 10                                  | 62            | 24.8       | 62                    | 5.1                                                                                |

Supplementary Figure 1: Coverage of ANC service components as reported by the pregnant women in exit survey on the PMSMA day. Bars denote 95% confidence interval, CHC Community Health Centre and SDH Sub-district hospital.

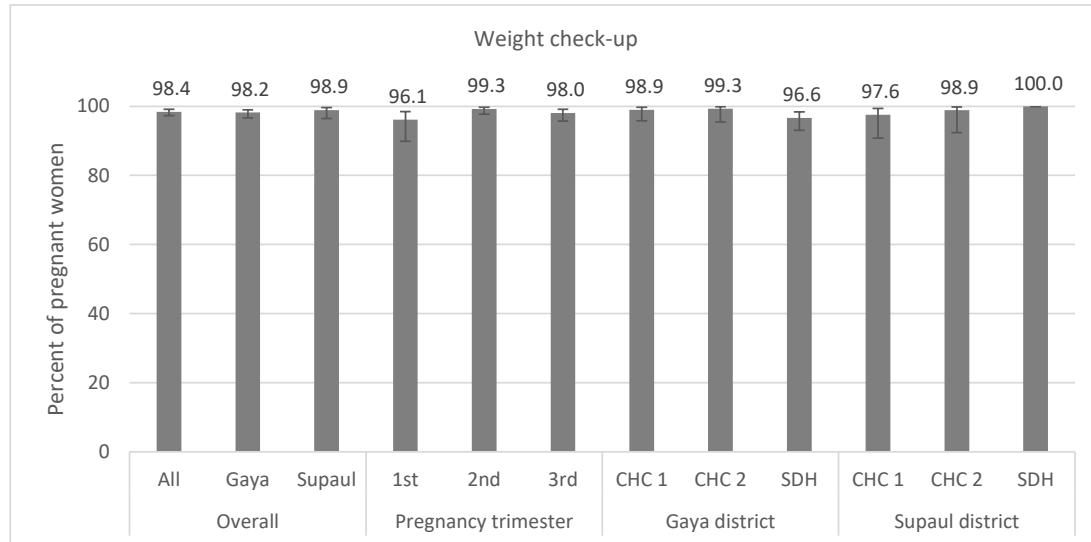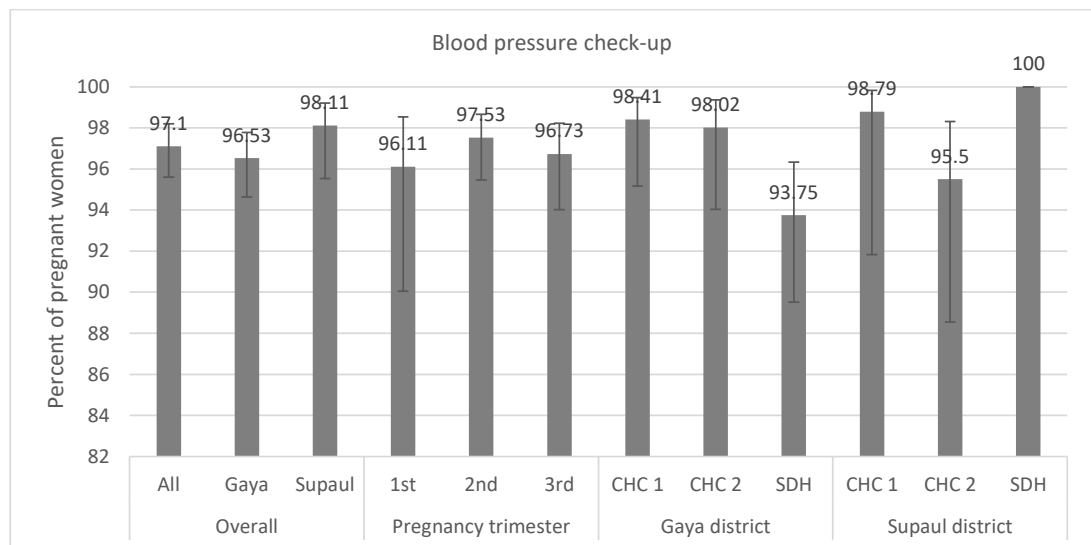

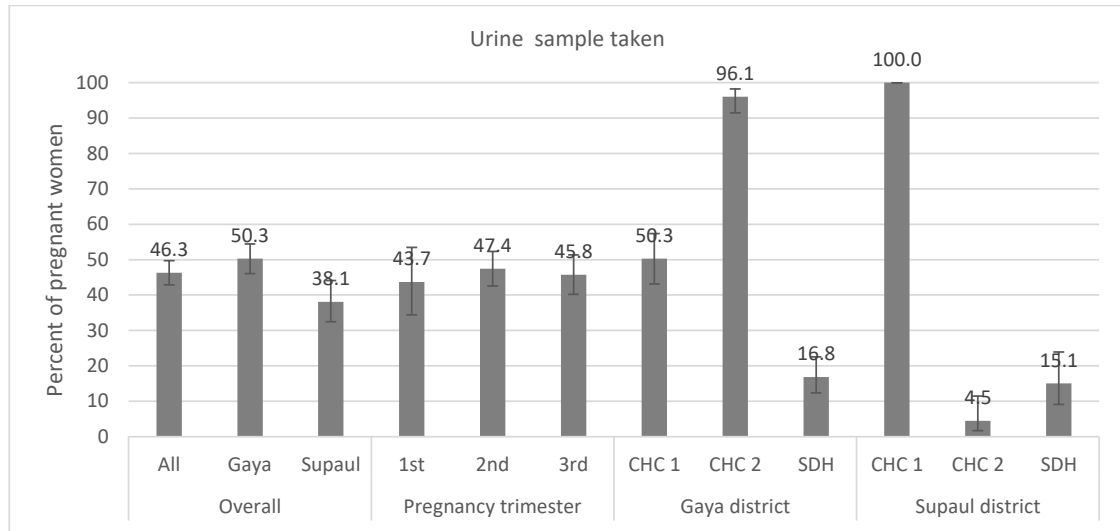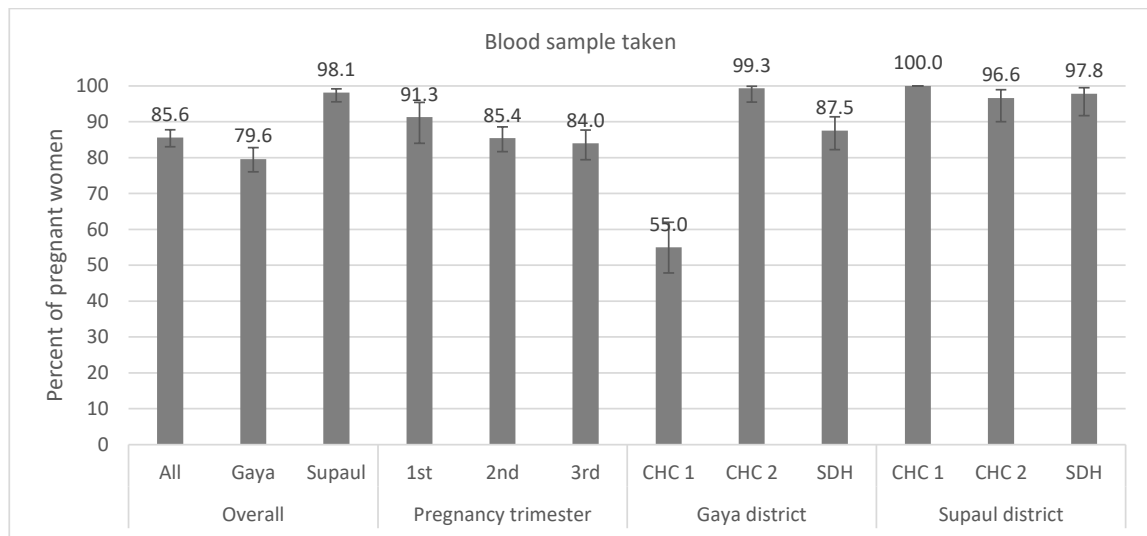

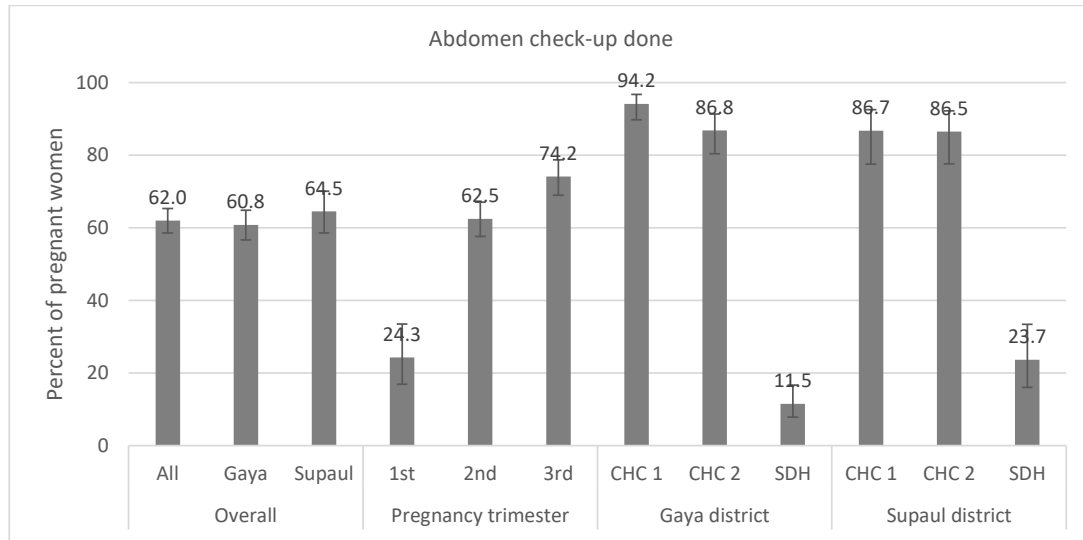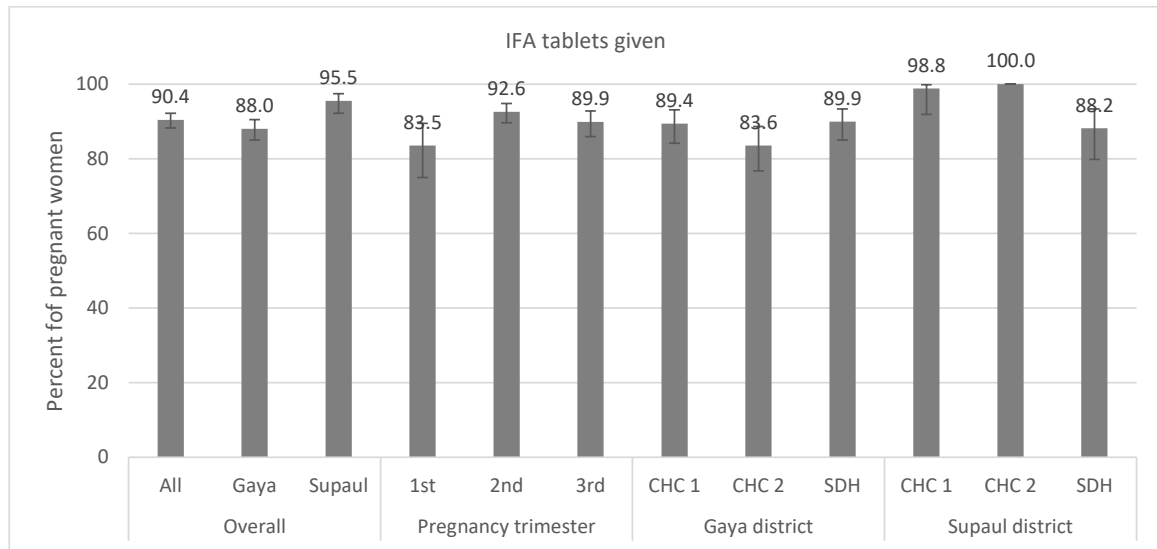



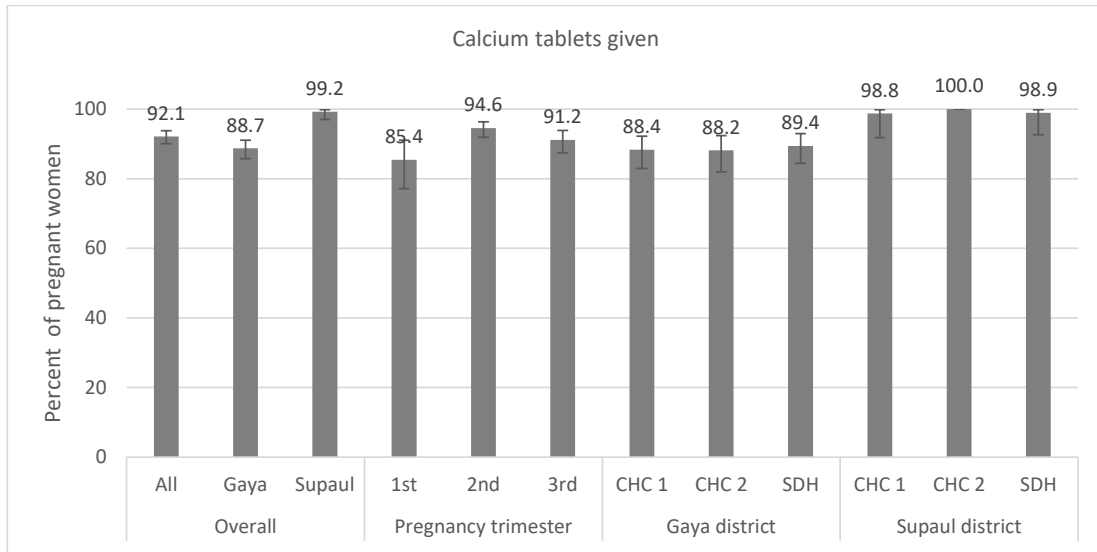

**Supplementary Figure 2. Coverage of each component of antenatal care (ANC) and quality of ANC services among the 306 pregnant women in their 3<sup>rd</sup> trimester by the number of their ANC visit.**

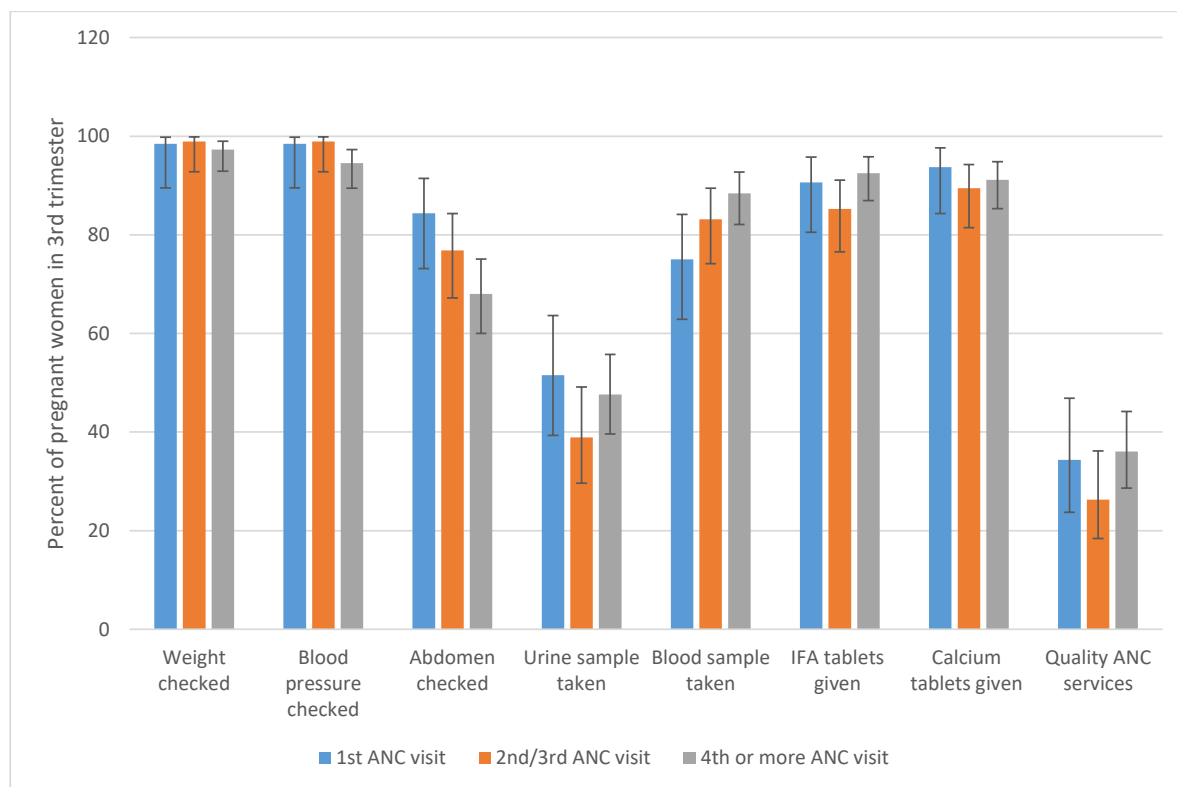

**Supplementary Figure 3: Make-shift toilet facility in one of the public sector health facilities for pregnant women to provide urine sample on PMSMA day.**

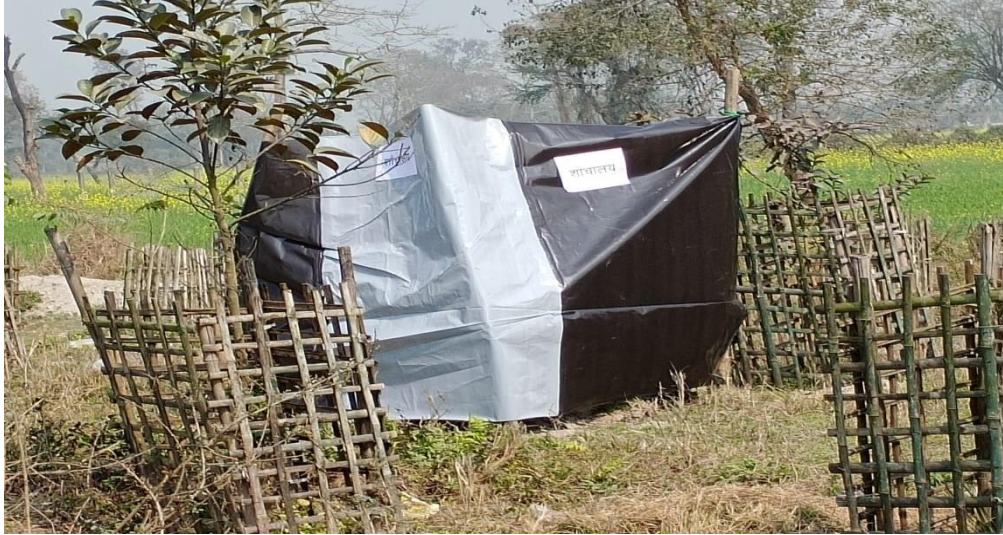

Supplement: inline-supplementary-material-1 [file inline-supplementary-material-1.pdf]
